# Supplementary material for: Effects of glucose spraying and lactic acid bacteria inoculation applied to high-moisture alfalfa during pre- and post-harvest periods on silage fermentation and feed quality
Source: PeerJ. 2025 Dec 18;13:e20276. doi: 10.7717/peerj.20276 (PMC12718523; doi:10.7717/peerj.20276)
Supplement: Supplemental Information 1 [file peerj-13-20276-s001.xlsx]

## Sheet: Sayfa1
Harvest	Inoculant	glucose doses	Repetition	PHT0	Dry Matter Ratio (DMT0)	lactic acid bacterai count (MRST0)	enterobacteria count (VRBT0)	Yeast(T0)
pre harvest	Control	0	1	6.44	20.6186	1	4.30963	6.98227		DM:Dry Matter Ratio
pre harvest	Control	0	2	6.37	22.8238	2.8451	5.1	6.76042		MRS: lactic acid bacterai count
pre harvest	Control	0	3	6.41	23.22	3.04139	6.37291	6.88536		VRB: enterobacteria count
pre harvest	Control	3	1	6.38	21.9917	4.11394	3.8451	8.29226
pre harvest	Control	3	2	6.32	22.5789	4.19033	7.74819	7.89209
pre harvest	Control	3	3	6.35	22.2597	4.19866	5.1	7.34242
pre harvest	Control	6	1	6.36	22.6	6	3.94448	8.67394
pre harvest	Control	6	2	6.38	24.3445	6.17609	4.6	8.76641
pre harvest	Control	6	3	6.37	23.97	6.25042	5.716	8.72263
pre harvest	l. plantarum	0	1	6.32	24.9735	2.53148	5.9	8.44091
pre harvest	l. plantarum	0	2	6.27	25.705	2.46538	5.5	7.90309
pre harvest	l. plantarum	0	3	6.3	25.0205	2.34242	5.82607	8.25042
pre harvest	l. plantarum	3	1	6.41	25.1339	5.81158	5.3	7.07918
pre harvest	l. plantarum	3	2	6.37	25.6804	5.82737	5.6149	7.76343
pre harvest	l. plantarum	3	3	6.39	25.6804	5.8169	5.9	7.54407
pre harvest	l. plantarum	6	1	6.38	24.6816	4.88081	6.1	7.34242
pre harvest	l. plantarum	6	2	6.38	24.6575	4.60206	5.9	6
pre harvest	l. plantarum	6	3	6.38	25.0239	4.92428	5.8	7.07918
pre harvest	l.citerum	0	1	6.43	24.2991	4.82942	5.64345	8.75435
pre harvest	l.citerum	0	2	6.43	24.3728	4.99123	5.70927	8.76042
pre harvest	l.citerum	0	3	6.43	24.6385	3.1	5.7839	8.84757
pre harvest	l.citerum	3	1	6.39	25.5193	6.20412	5.53656	6.04139
pre harvest	l.citerum	3	2	6.39	25.6443	5.80618	5.3	7.25527
pre harvest	l.citerum	3	3	6.39	25.5488	6.4	5.8	8.14613
pre harvest	l.citerum	6	1	6.31	26.1584	5.98227	5.74819	7.14613
pre harvest	l.citerum	6	2	6.31	26.068	6.01703	4.65896	6.95424
pre harvest	l.citerum	6	3	6.31	25.11	6.10721	6.77232	7.07918
post harvest	Control	0	1	6.36	22.4091	4.44716	6.30103	9.04139
post harvest	Control	0	2	6.36	22.9923	4.41497	5.87506	5.60206
post harvest	Control	0	3	6.36	21	4.14613	6.22583	7.41497
post harvest	Control	3	1	6.36	22.8172	4.42	7.54242	7.81206
post harvest	Control	3	2	6.36	22.568	4.5863	5.14242	5.87103
post harvest	Control	3	3	6.36	20.89	4.76303	6.43136	5.67712
post harvest	Control	6	1	6.39	23.272	5.44716	5.09691	6.95424
post harvest	Control	6	2	6.39	22.561	6.39445	5.17609	6.90309
post harvest	Control	6	3	6.39	23	6.38021	8.24304	7.23045
post harvest	l. plantarum	0	1	6.46	23.0769	5.18184	6.10857	7.64716
post harvest	l. plantarum	0	2	6.46	20	5.2833	5.49415	6.11394
post harvest	l. plantarum	0	3	6.46	19.5	5.35025	5.8	7.95103
post harvest	l. plantarum	3	1	6.52	23.6967	5.56585	6	7.17609
post harvest	l. plantarum	3	2	6.52	24.2009	5.56585	6.3	6.95424
post harvest	l. plantarum	3	3	6.52	23.95	5.62737	6.4	6.60206
post harvest	l. plantarum	6	1	6.6	24.0175	5.59329	5.8	7.41497
post harvest	l. plantarum	6	2	6.6	23.1092	5.51587	5.44716	7.25527
post harvest	l. plantarum	6	3	6.6	23.0769	5.20412	5.1	7.34242
post harvest	l.citerum	0	1	6.44	22.3552	5.72263	5.45939	7.8451
post harvest	l.citerum	0	2	6.44	22.7983	5.89432	5.7	4.90309
post harvest	l.citerum	0	3	6.44	22.6	5.48287	5.2	7.77815
post harvest	l.citerum	3	1	6.42	22.5	5.88536	5.33445	7
post harvest	l.citerum	3	2	6.42	23.6842	7.89432	5.5	6.77815
post harvest	l.citerum	3	3	6.42	23.09	7.11793	5.2	6.90309
post harvest	l.citerum	6	1	6.42	23.4818	6.09621	4.2	7.04139
post harvest	l.citerum	6	2	6.42	23.5897	6.04922	5.4	6.60206
post harvest	l.citerum	6	3	6.42	23	6.02366	6.40412	6.90309
