# Supplementary material for: Effects of glucose spraying and lactic acid bacteria inoculation applied to high-moisture alfalfa during pre- and post-harvest periods on silage fermentation and feed quality
Source: PeerJ. 2025 Dec 18;13:e20276. doi: 10.7717/peerj.20276 (PMC12718523; doi:10.7717/peerj.20276)
Supplement: Supplemental Information 2 [file peerj-13-20276-s002.xlsx]

## Sheet: Sayfa1
Harvest	Inokulant	glucose doses	Repetition	PHT60	Dry Matter Ratio (DMT60)	Lactic Acid Bacteria count (MRST60)	Enterobacteria Count (VRBT60)	Yeast T60
pre-harvest	control	0	1	5.15	19	1.64345	3.63347	5.39794
pre-harvest	control	0	2	5.51	20.15	1.62325	4.49136	5.38021
pre-harvest	control	0	3	5.45	20.16	1.6721	4.24551	2.30103
pre-harvest	control	3	1	5.32	20.01	2.09691	2.49136	3
pre-harvest	control	3	2	5.3	20.81	3.08636	2.5682	4.30103					DM:Dry Matter Ratio
pre-harvest	control	3	3	5.34	20.83	3.07918	5.53148	5.8					MRS: Lactic Acid Bacteria count
pre-harvest	control	6	1	5.04	20.98	3.99329	3.11394	3.8					VRB: Enterobacteria Count
pre-harvest	control	6	2	5.08	23	4.47712	3.74036	4.4					DDM: dry matter conservation
pre-harvest	control	6	3	5.06	22.98	4.3	3.47712	4.6
pre-harvest	l. plantarum	0	1	5.14	23.8579	1.65128	5.51587	3.9
pre-harvest	l. plantarum	0	2	5.05	21.4686	1.61066	3.04139	4.8
pre-harvest	l. plantarum	0	3	5.05	24.1476	1.47712	4.34044	4.51
pre-harvest	l. plantarum	3	1	4.96	23.088	3.09621	3.30103	3.38021
pre-harvest	l. plantarum	3	2	4.95	23.7969	3.7356	4.60206	4.6
pre-harvest	l. plantarum	3	3	4.99	22.5124	4.70927	4.85126	3.9
pre-harvest	l. plantarum	6	1	4.85	22.9767	4.11793	3.39794	3.1
pre-harvest	l. plantarum	6	2	4.81	22.6518	5.99651	2.34242	4
pre-harvest	l. plantarum	6	3	4.84	24.31	4.25527	4.43136	4.60206
pre-harvest	l.citerum	0	1	5.18	22.2042	1.36549	4.21484	3.83045
pre-harvest	l.citerum	0	2	5.2	22.2395	2.14613	2.90309	4.44613
pre-harvest	l.citerum	0	3	5.19	22.5264	2.38021	3.91381	4.60206
pre-harvest	l.citerum	3	1	5.13	24.6919	3.31806	4.8451	3.70103
pre-harvest	l.citerum	3	2	5.14	24.8881	3.69548	2.47712	3.43136
pre-harvest	l.citerum	3	3	5.13	24.6968	4	2	4.34242
pre-harvest	l.citerum	6	1	5.01	25.0125	4.65896	2.95424	2.01
pre-harvest	l.citerum	6	2	5	25.1715	5.18639	4.45332	4.11
pre-harvest	l.citerum	6	3	5	24.5979	4.68124	3.16732	4.5682
post-harvest	control	0	1	5.81	19.442	1.50515	2.30103	5.5
post-harvest	control	0	2	5.6	19.3726	2.76042	4.60206	5.81291
post-harvest	control	0	3	5.45	18.3873	2.8451	3.47712	6.1
post-harvest	control	3	1	5.71	21.884	3.60206	2.47712	4.92
post-harvest	control	3	2	5.21	22.0229	3.50515	3.6721	5.27875
post-harvest	control	3	3	5.15	19.0086	1.60206	3.39794	5.57609
post-harvest	control	6	1	5.08	21.9827	4.65128	3.30103	4
post-harvest	control	6	2	5.07	22.3142	5.45939	3.25527	6.20412
post-harvest	control	6	3	5.07	20.8574	4.77815	3.27875	5.07918
post-harvest	l. plantarum	0	1	5.1	22.5184	2.27712	3.47712	4.4
post-harvest	l. plantarum	0	2	5.04	17.5917	1.60206	2.90309	4.75587
post-harvest	l. plantarum	0	3	5.11	17.8813	2.8	2.69897	5.3
post-harvest	l. plantarum	3	1	5	22.836	3.4	3.27875	4.48855
post-harvest	l. plantarum	3	2	5.01	22.2065	2.41497	2.77815	4.70757
post-harvest	l. plantarum	3	3	5	22.4581	3.6451	3.17609	5.14613
post-harvest	l. plantarum	6	1	4.99	22.111	4.77815	2.90309	4
post-harvest	l. plantarum	6	2	5.01	20.22	3.87622	3.04139	4.26717
post-harvest	l. plantarum	6	3	4.98	21.0846	4.69897	2.95424	4.6
post-harvest	l.citerum	0	1	5.17	20.9837	1	2.77815	5.5
post-harvest	l.citerum	0	2	5.3	20.5163	1.01703	3.57978	3.7
post-harvest	l.citerum	0	3	5.12	20.3806	3	3.34242	4.74819
post-harvest	l.citerum	3	1	5.1	20.7336	3.47712	5	3.8
post-harvest	l.citerum	3	2	5.08	21.7293	3.69548	1.04139	4.04922
post-harvest	l.citerum	3	3	5.07	21.3825	3.29226	3	4.98
post-harvest	l.citerum	6	1	5.02	21.8796	4.44716	2.30103	3.7
post-harvest	l.citerum	6	2	5.04	22.6824	4.43136	1.60206	4.04922
post-harvest	l.citerum	6	3	5.04	21.78	2.24551	3.47712	4.4
