# Supplementary material for: Effects of glucose spraying and lactic acid bacteria inoculation applied to high-moisture alfalfa during pre- and post-harvest periods on silage fermentation and feed quality
Source: PeerJ. 2025 Dec 18;13:e20276. doi: 10.7717/peerj.20276 (PMC12718523; doi:10.7717/peerj.20276)
Supplement: Supplemental Information 3 [file peerj-13-20276-s003.xlsx]

## Sheet: Sayfa1
Harvest	Inokulant	glucose doses	Repetition	neutral detergent fiber (T60NDF)	acid detergent fiber (T60ADF)	acid detergent lignin (T60ADL)	relative feed value (RFV)	Crude protein ratio (CP)
pre-harvest	control	0	1	32.7701	25.7485	5.32417	195.419	20.4286
pre-harvest	control	0	2	35.3846	23.2567	6.05395	186.083	20.8364
pre-harvest	control	0	3	35.1527	24.5074	6.56158	184.732	21.0946
pre-harvest	control	3	1	33.3865	23.6892	5.61753	196.281	22.3246		RFV:relative feed value
pre-harvest	control	3	2	33.8868	21.4645	5.82116	198.14	23.7475		NDF:neutral detergent fiber
pre-harvest	control	3	3	35.8084	25.9741	6.0479	178.382	21.8671		ADF: acid detergent fiber
pre-harvest	control	6	1	34.1785	20.9369	6.40846	197.568	23.2325		ADL: acid detergent lignin
pre-harvest	control	6	2	35.1116	24.3946	6.26358	185.181	22.5179		CP:Crude protein ratio
pre-harvest	control	6	3	36.4142	23.713	5.68475	179.913	21.9184
pre-harvest	l. plantarum	0	1	34.0793	20.2199	4.98626	199.668	22.6443
pre-harvest	l. plantarum	0	2	33.6324	24.92	5.45906	192.194	24.6286
pre-harvest	l. plantarum	0	3	36.3191	23.7897	6.20127	180.231	20.3425
pre-harvest	l. plantarum	3	1	37.07	27.8774	7.13251	168.59	23.839
pre-harvest	l. plantarum	3	2	34.0349	23.0186	5.15813	193.969	20.2232
pre-harvest	l. plantarum	3	3	30.1016	23.457	6.23047	218.259	19.9662
pre-harvest	l. plantarum	6	1	29.1507	22.6418	5.5128	227.405	22.97
pre-harvest	l. plantarum	6	2	38.4697	23.6551	5.55556	170.409	23.3111
pre-harvest	l. plantarum	6	3	31.2815	20.6661	5.39342	216.492	23.6387
pre-harvest	l.citerum	0	1	34.19	27.8757	7.86432	182.795	20.17
pre-harvest	l.citerum	0	2	33.0796	22.9912	6.0531	199.631	21.18
pre-harvest	l.citerum	0	3	35.3036	24.5893	6.01786	183.775	20.54
pre-harvest	l.citerum	3	1	32.8336	20.137	4.88617	207.426	21.18
pre-harvest	l.citerum	3	2	34.1988	21.2943	5.65782	196.693	21.37
pre-harvest	l.citerum	3	3	35.3001	21.731	5.27121	189.66	20.45
pre-harvest	l.citerum	6	1	39.27	23.6765	5.97773	166.897	23.69
pre-harvest	l.citerum	6	2	32.3236	20.8247	5.36082	209.157	23.92
pre-harvest	l.citerum	6	3	25.1568	20.6416	5.37228	269.27	21.65
post-harvest	control	0	1	33.121	23.6043	6.36943	198.04	19.7422
post-harvest	control	0	2	36.5172	22.8672	5.64644	181.085	18.0807
post-harvest	control	0	3	34.2361	24.1315	6.57452	190.474	18.295
post-harvest	control	3	1	30.8034	28.3986	6.86327	201.662	19.3159
post-harvest	control	3	2	33.4378	29.4002	8.02149	183.603	20.4969
post-harvest	control	3	3	38.1579	24.5928	7.01177	170.021	19.9362
post-harvest	control	6	1	30.1833	23.4664	6.33777	217.646	20.0695
post-harvest	control	6	2	38.6108	23.919	6.30896	169.291	20.4763
post-harvest	control	6	3	36.4353	26.4439	7.07798	174.378	20.6388
post-harvest	l. plantarum	0	1	38.3559	27.7313	6.95428	163.214	21.5813
post-harvest	l. plantarum	0	2	31.3156	20.6709	4.96627	216.245	19.0582
post-harvest	l. plantarum	0	3	33.3269	22.9099	5.40073	198.326	20.6708
post-harvest	l. plantarum	3	1	32.0642	20.5644	5.31504	211.438	20.5729
post-harvest	l. plantarum	3	2	36.651	25.3246	6.73565	175.565	21.7217
post-harvest	l. plantarum	3	3	35.2389	23.5205	6.35373	186.31	21.5084
post-harvest	l. plantarum	6	1	33.1672	23.9173	6.73395	197.08	19.8516
post-harvest	l. plantarum	6	2	30.5816	26.3711	6.45161	207.928	20.1347
post-harvest	l. plantarum	6	3	36.4791	26.1512	6.93576	174.75	20.4066
post-harvest	l.citerum	0	1	30.8204	20.8191	5.93116	219.371	19.5276
post-harvest	l.citerum	0	2	33.6277	28.9751	6.3834	183.482	18.3659
post-harvest	l.citerum	0	3	38.2076	24.9501	6.42715	169.122	20.3247
post-harvest	l.citerum	3	1	30.8147	25.115	7.86741	209.309	19.3659
post-harvest	l.citerum	3	2	38.0431	26.7682	6.88233	166.39	20.1836
post-harvest	l.citerum	3	3	35.43	25.89	7.37	180.459	21.08
post-harvest	l.citerum	6	1	32.4484	27.307	6.23145	193.876	20.4492
post-harvest	l.citerum	6	2	37.5511	23.5389	6.45821	174.802	20.6401
post-harvest	l.citerum	6	3	36.5	26.05	6.34	174.851	22.076
