# Supplementary material for: Effects of glucose spraying and lactic acid bacteria inoculation applied to high-moisture alfalfa during pre- and post-harvest periods on silage fermentation and feed quality
Source: PeerJ. 2025 Dec 18;13:e20276. doi: 10.7717/peerj.20276 (PMC12718523; doi:10.7717/peerj.20276)
Supplement: Supplemental Information 4 [file peerj-13-20276-s004.xlsx]

## Sheet: Sheet1
Harvest	Inoculant	Glucose doses	Repetition	PHT60	DM T60 (Dry Matter at T60)	MRS T60 (Lactic acid bacteria count at T60)	VRB T60 (Enterobacteria count at T60)	Yeast T60 (Yeast count at T60)	DDM ( Dry Matter Recovery)	PHT0	DM(T0) (Dry Matter ratio T0)	MRS(T0) (Lactic acid bacteria count at T0)	VRB(T0) (Enterobacteria count at T0)	Yeast(T0) (Yeast count at T0)	NDF (Neutral Detergent Fiber)	ADF (Acid Detergent Fiber)	ADL (Acid Detergent Lignin)	RFV (Relative Feed Value)	CP (Crude Protein Ratio)
pre harvest	Control	0	1	5.15	19	1.64345	3.63347	5.39794	148.562	6.44	20.6186	1	4.30963	6.98227	32.7701	25.7485	5.32417	195.419	20.4286
pre harvest	Control	0	2	5.51	20.15	1.62325	4.49136	5.38021	119.79	6.37	22.8238	2.8451	5.1	6.76042	35.3846	23.2567	6.05395	186.083	20.8364
pre harvest	Control	0	3	5.45	20.16	1.6721	4.24551	2.30103	54.1991	6.41	23.22	3.04139	6.37291	6.88536	35.1527	24.5074	6.56158	184.732	21.0946
pre harvest	Control	3	1	5.32	20.01	2.09691	2.49136	3	120.416	6.38	21.9917	4.11394	3.8451	8.29226	33.3865	23.6892	5.61753	196.281	22.3246
pre harvest	Control	3	2	5.3	20.81	3.08636	2.5682	4.30103	167.472	6.32	22.5789	4.19033	7.74819	7.89209	33.8868	21.4645	5.82116	198.14	23.7475
pre harvest	Control	3	3	5.34	20.83	3.07918	5.53148	5.8	104.854	6.35	22.2597	4.19866	5.1	7.34242	35.8084	25.9741	6.0479	178.382	21.8671
pre harvest	Control	6	1	5.04	20.98	3.99329	3.11394	3.8	122.032	6.36	22.6	6	3.94448	8.67394	34.1785	20.9369	6.40846	197.568	23.2325
pre harvest	Control	6	2	5.08	23	4.47712	3.74036	4.4	117.636	6.38	24.3445	6.17609	4.6	8.76641	35.1116	24.3946	6.26358	185.181	22.5179
pre harvest	Control	6	3	5.06	22.98	4.3	3.47712	4.6	132.293	6.37	23.97	6.25042	5.716	8.72263	36.4142	23.713	5.68475	179.913	21.9184
pre harvest	l. plantarum	0	1	5.14	23.8579	1.65128	5.51587	3.9	70.705	6.32	24.9735	2.53148	5.9	8.44091	34.0793	20.2199	4.98626	199.668	22.6443
pre harvest	l. plantarum	0	2	5.05	21.4686	1.61066	3.04139	4.8	157.822	6.27	25.705	2.46538	5.5	7.90309	33.6324	24.92	5.45906	192.194	24.6286
pre harvest	l. plantarum	0	3	5.05	24.1476	1.47712	4.34044	4.51	103.906	6.3	25.0205	2.34242	5.82607	8.25042	36.3191	23.7897	6.20127	180.231	20.3425
pre harvest	l. plantarum	3	1	4.96	23.088	3.09621	3.30103	3.38021	102.399	6.41	25.1339	5.81158	5.3	7.07918	37.07	27.8774	7.13251	168.59	23.839
pre harvest	l. plantarum	3	2	4.95	23.7969	3.7356	4.60206	4.6	99.9552	6.37	25.6804	5.82737	5.6149	7.76343	34.0349	23.0186	5.15813	193.969	20.2232
pre harvest	l. plantarum	3	3	4.99	22.5124	4.70927	4.85126	3.9	80.3915	6.39	25.6804	5.8169	5.9	7.54407	30.1016	23.457	6.23047	218.259	19.9662
pre harvest	l. plantarum	6	1	4.85	22.9767	4.11793	3.39794	3.1	91.2317	6.38	24.6816	4.88081	6.1	7.34242	29.1507	22.6418	5.5128	227.405	22.97
pre harvest	l. plantarum	6	2	4.81	22.6518	5.99651	2.34242	4	170.763	6.38	24.6575	4.60206	5.9	6	38.4697	23.6551	5.55556	170.409	23.3111
pre harvest	l. plantarum	6	3	4.84	24.31	4.25527	4.43136	4.60206	103.852	6.38	25.0239	4.92428	5.8	7.07918	31.2815	20.6661	5.39342	216.492	23.6387
pre harvest	l.citerum	0	1	5.18	22.2042	1.36549	4.21484	3.83045	90.88	6.43	24.2991	4.82942	5.64345	8.75435	34.19	27.8757	7.86432	182.795	20.17
pre harvest	l.citerum	0	2	5.2	22.2395	2.14613	2.90309	4.44613	153.152	6.43	24.3728	4.99123	5.70927	8.76042	33.0796	22.9912	6.0531	199.631	21.18
pre harvest	l.citerum	0	3	5.19	22.5264	2.38021	3.91381	4.60206	117.585	6.43	24.6385	3.1	5.7839	8.84757	35.3036	24.5893	6.01786	183.775	20.54
pre harvest	l.citerum	3	1	5.13	24.6919	3.31806	4.8451	3.70103	76.3871	6.39	25.5193	6.20412	5.53656	6.04139	32.8336	20.137	4.88617	207.426	21.18
pre harvest	l.citerum	3	2	5.14	24.8881	3.69548	2.47712	3.43136	138.522	6.39	25.6443	5.80618	5.3	7.25527	34.1988	21.2943	5.65782	196.693	21.37
pre harvest	l.citerum	3	3	5.13	24.6968	4	2	4.34242	217.121	6.39	25.5488	6.4	5.8	8.14613	35.3001	21.731	5.27121	189.66	20.45
pre harvest	l.citerum	6	1	5.01	25.0125	4.65896	2.95424	2.01	68.0377	6.31	26.1584	5.98227	5.74819	7.14613	39.27	23.6765	5.97773	166.897	23.69
pre harvest	l.citerum	6	2	5	25.1715	5.18639	4.45332	4.11	92.2907	6.31	26.068	6.01703	4.65896	6.95424	32.3236	20.8247	5.36082	209.157	23.92
pre harvest	l.citerum	6	3	5	24.5979	4.68124	3.16732	4.5682	144.229	6.31	25.11	6.10721	6.77232	7.07918	25.1568	20.6416	5.37228	269.27	21.65
post harvest	Control	0	1	5.81	19.442	1.50515	2.30103	5.5	239.023	6.36	22.4091	4.44716	6.30103	9.04139	33.121	23.6043	6.36943	198.04	19.7422
post harvest	Control	0	2	5.6	19.3726	2.76042	4.60206	5.81291	126.311	6.36	22.9923	4.41497	5.87506	5.60206	36.5172	22.8672	5.64644	181.085	18.0807
post harvest	Control	0	3	5.45	18.3873	2.8451	3.47712	6.1	175.432	6.36	21	4.14613	6.22583	7.41497	34.2361	24.1315	6.57452	190.474	18.295
post harvest	Control	3	1	5.71	21.884	3.60206	2.47712	4.92	198.618	6.36	22.8172	4.42	7.54242	7.81206	30.8034	28.3986	6.86327	201.662	19.3159
post harvest	Control	3	2	5.21	22.0229	3.50515	3.6721	5.27875	143.753	6.36	22.568	4.5863	5.14242	5.87103	33.4378	29.4002	8.02149	183.603	20.4969
post harvest	Control	3	3	5.15	19.0086	1.60206	3.39794	5.57609	164.102	6.36	20.89	4.76303	6.43136	5.67712	38.1579	24.5928	7.01177	170.021	19.9362
post harvest	Control	6	1	5.08	21.9827	4.65128	3.30103	4	121.174	6.39	23.272	5.44716	5.09691	6.95424	30.1833	23.4664	6.33777	217.646	20.0695
post harvest	Control	6	2	5.07	22.3142	5.45939	3.25527	6.20412	190.587	6.39	22.561	6.39445	5.17609	6.90309	38.6108	23.919	6.30896	169.291	20.4763
post harvest	Control	6	3	5.07	20.8574	4.77815	3.27875	5.07918	154.912	6.39	23	6.38021	8.24304	7.23045	36.4353	26.4439	7.07798	174.378	20.6388
post harvest	l. plantarum	0	1	5.1	22.5184	2.27712	3.47712	4.4	126.541	6.46	23.0769	5.18184	6.10857	7.64716	38.3559	27.7313	6.95428	163.214	21.5813
post harvest	l. plantarum	0	2	5.04	17.5917	1.60206	2.90309	4.75587	163.821	6.46	20	5.2833	5.49415	6.11394	31.3156	20.6709	4.96627	216.245	19.0582
post harvest	l. plantarum	0	3	5.11	17.8813	2.8	2.69897	5.3	196.371	6.46	19.5	5.35025	5.8	7.95103	33.3269	22.9099	5.40073	198.326	20.6708
post harvest	l. plantarum	3	1	5	22.836	3.4	3.27875	4.48855	136.898	6.52	23.6967	5.56585	6	7.17609	32.0642	20.5644	5.31504	211.438	20.5729
post harvest	l. plantarum	3	2	5.01	22.2065	2.41497	2.77815	4.70757	169.45	6.52	24.2009	5.56585	6.3	6.95424	36.651	25.3246	6.73565	175.565	21.7217
post harvest	l. plantarum	3	3	5	22.4581	3.6451	3.17609	5.14613	162.027	6.52	23.95	5.62737	6.4	6.60206	35.2389	23.5205	6.35373	186.31	21.5084
post harvest	l. plantarum	6	1	4.99	22.111	4.77815	2.90309	4	137.784	6.6	24.0175	5.59329	5.8	7.41497	33.1672	23.9173	6.73395	197.08	19.8516
post harvest	l. plantarum	6	2	5.01	20.22	3.87622	3.04139	4.26717	140.303	6.6	23.1092	5.51587	5.44716	7.25527	30.5816	26.3711	6.45161	207.928	20.1347
post harvest	l. plantarum	6	3	4.98	21.0846	4.69897	2.95424	4.6	155.708	6.6	23.0769	5.20412	5.1	7.34242	36.4791	26.1512	6.93576	174.75	20.4066
post harvest	l.citerum	0	1	5.17	20.9837	1	2.77815	5.5	197.973	6.44	22.3552	5.72263	5.45939	7.8451	30.8204	20.8191	5.93116	219.371	19.5276
post harvest	l.citerum	0	2	5.3	20.5163	1.01703	3.57978	3.7	103.358	6.44	22.7983	5.89432	5.7	4.90309	33.6277	28.9751	6.3834	183.482	18.3659
post harvest	l.citerum	0	3	5.12	20.3806	3	3.34242	4.74819	142.058	6.44	22.6	5.48287	5.2	7.77815	38.2076	24.9501	6.42715	169.122	20.3247
post harvest	l.citerum	3	1	5.1	20.7336	3.47712	5	3.8	76	6.42	22.5	5.88536	5.33445	7	30.8147	25.115	7.86741	209.309	19.3659
post harvest	l.citerum	3	2	5.08	21.7293	3.69548	1.04139	4.04922	388.827	6.42	23.6842	7.89432	5.5	6.77815	38.0431	26.7682	6.88233	166.39	20.1836
post harvest	l.citerum	3	3	5.07	21.3825	3.29226	3	4.98	166	6.42	23.09	7.11793	5.2	6.90309	35.43	25.89	7.37	180.459	21.08
post harvest	l.citerum	6	1	5.02	21.8796	4.44716	2.30103	3.7	160.798	6.42	23.4818	6.09621	4.2	7.04139	32.4484	27.307	6.23145	193.876	20.4492
post harvest	l.citerum	6	2	5.04	22.6824	4.43136	1.60206	4.04922	252.751	6.42	23.5897	6.04922	5.4	6.60206	37.5511	23.5389	6.45821	174.802	20.6401
post harvest	l.citerum	6	3	5.04	21.78	2.24551	3.47712	4.4	126.541	6.42	23	6.02366	6.40412	6.90309	36.5	26.05	6.34	174.851	22.076
